## The HIV-derived protein Vpr<sub>52-96</sub> has anti-glioma activity *in vitro* and *in vivo*

Jens Kübler<sup>1,\*</sup>, Stefanie Kirschner<sup>2,\*</sup>, Linda Hartmann<sup>1</sup>, Grit Welzel<sup>1</sup>, Maren Engelhardt<sup>3</sup>, Carsten Herskind<sup>1</sup>, Marlon R. Veldwijk<sup>1</sup>, Christian Schultz<sup>3</sup>, Manuela Felix<sup>4</sup>, Gerhard Glatting<sup>4</sup>, Patrick Maier<sup>1</sup>, Frederik Wenz<sup>1</sup>, Marc A. Brockmann<sup>5,\*</sup>, Frank A. Giordano<sup>1,\*</sup>

<sup>1</sup>Department of Radiation Oncology, Universitätsmedizin Mannheim, Medical Faculty Mannheim, Heidelberg University, Mannheim, Germany

<sup>2</sup>Department of Neuroradiology, Universitätsmedizin Mannheim, Medical Faculty Mannheim, Heidelberg University, Mannheim, Germany

<sup>3</sup>Centre for Biomedicine and Medical Technology Mannheim (CBTM), Institute of Neuroanatomy, Medical Faculty Mannheim, Heidelberg University, Mannheim, Germany

<sup>4</sup>Medical Radiation Physics/Radiation Protection, Universitätsmedizin Mannheim, Medical Faculty Mannheim, Heidelberg University, Mannheim, Germany

<sup>5</sup>Department of Neuroradiology, University Medical Center of the Johannes Gutenberg University Mainz, Mainz, Germany

\*These authors have contributed equally to this work

**Correspondence to:** Frank A. Giordano, **email:** frank.giordano@umm.de

**Keywords:** glioblastoma, viral protein R, irradiation, MGMT, temozolomide

**Received:** February 06, 2016

**Accepted:** May 16, 2016

**Published:** June 2, 2016

### ABSTRACT

**Patients with actively replicating human immunodeficiency virus (HIV) exhibit adverse reactions even to low irradiation doses. High levels of the virus-encoded viral protein R (Vpr) are believed to be one of the major underlying causes for increased radiosensitivity. As Vpr efficiently crosses the blood-brain barrier and accumulates in astrocytes, we examined its efficacy as a drug for treatment of glioblastoma multiforme (GBM).**

***In vitro*, four glioblastoma-derived cell lines with and without methylguanine-DNA methyltransferase (MGMT) overexpression (U251, U87, U251-MGMT, U87-MGMT) were exposed to Vpr, temozolomide (TMZ), conventional photon irradiation (2 to 6 Gy) or to combinations thereof. Vpr showed high rates of acute toxicities with median effective doses of  $4.0 \pm 1.1 \mu\text{M}$  and  $15.7 \pm 7.5 \mu\text{M}$  for U251 and U87 cells, respectively. Caspase assays revealed Vpr-induced apoptosis in U251, but not in U87 cells. Vpr also efficiently inhibited clonogenic survival in both U251 and U87 cells and acted additively with irradiation. In contrast to TMZ, Vpr acted independently of MGMT expression.**

**Dose escalation in mice (n=12) was feasible and resulted in no evident renal or liver toxicity. Both, irradiation with 3x5 Gy (n=8) and treatment with Vpr (n=5) delayed intracerebral tumor growth and prolonged overall survival compared to untreated animals (n=5;  $p_{3 \times 5 \text{ Gy}} < 0.001$  and  $p_{\text{Vpr}} = 0.04$ ; log-rank test).**

**Our data show that the HIV-encoded peptide Vpr exhibits all properties of an effective chemotherapeutic drug and may be a useful agent in the treatment of GBM.**

### INTRODUCTION

Patients infected with the human immunodeficiency virus (HIV) are highly predisposed to develop AIDS-defining and non-AIDS-defining malignancies [1]. Although

many of these tumors (such as Kaposi's sarcoma or non-Hodgkin lymphoma) are highly radiosensitive, radiotherapy (RT) of these tumors may be challenging in HIV-infected patients as they exhibit increased rates of adverse effects even with highly active antiretroviral therapy [2–6].

The agent causing this increase in radiosensitivity is believed to be a virus-encoded peptide termed Viral protein R (Vpr) [7]. Vpr can be found virion-associated, intracellular and extracellular in cerebrospinal fluid (CSF), as well as in plasma of HIV-infected patients [8]. Over the last decade, various activities have been ascribed to the peptide: First, Vpr has been reported to cause efficient cell cycle arrest in G2- and M- phases, where cells are most radiosensitive [9–13]. Second, Vpr induces activation of caspase 3, 7, 8 and 9 [8, 14], which most likely is mediated via permeabilization of the mitochondrial membrane, uncoupling of the respiration chain and release of pro-apoptotic proteins. Third, Vpr has been found to bind to host cellular DNA, hereby inducing double strand breaks and genomic instability [15, 16], which putatively resembles a conserved mechanism to allow integrase-independent integration of HIV [17].

In addition, Vpr creates cellular damage profiles similar to cisplatin [18] and alkylating agents [15] and the use of the protein as a cancer treatment had been proposed many years ago and the mechanisms behind its effects have been explored since [19]. Various tumor entities are sensitive to Vpr, including neuroblastoma (LAN-2), lymphoma (U937), WHO grade III astrocytoma (U373), cervical cancer (HeLa), liver (HepG2), kidney (293T), melanoma (B16.F10) and leukemia (Jurkat T) cells [8, 20–22]. Consequently, first successful approaches to explore the therapeutic efficacy of Vpr were made in gene transfer studies, where Vpr over-expression inhibited growth of melanoma (B78/H1) and oral squamous cell carcinoma cell lines (AT-84) *in vitro* and *in vivo* [10, 23, 24]. The protein was also already employed as a local therapeutic agent by Siddiqui and colleagues, who injected Vpr into mammary carcinoma allografts in mice and observed efficient tumor regression with development of central necrosis in Vpr-treated tumors [18].

Due to the potential radiosensitizing ability in HIV-infected humans and its alkylator-like cellular damage signature, we hypothesized Vpr to have potential as a novel agent for the treatment of high-grade gliomas, and specifically glioblastoma multiforme (GBM). Whereas both RT and alkylating agents (i.e. temozolomide, TMZ) are considered as the current standard for adjuvant treatment of GBM [25], only modestly improved outcomes are achievable with TMZ in this tumor entity with reported median survival rates ranging between 12 and 14 months [26, 27]. However, in patients (over)expressing the O<sup>6</sup>-Methylguanine-DNA-Methyltransferase (MGMT) gene due to promoter de-methylation, prognosis is even more devastating as to date there is no systemic therapy option with proven efficacy [25, 28].

In the present work we investigated the effects of Vpr on U251, U251-MGMT, U87 and U87-MGMT cells alone or in combination with irradiation and TMZ *in vitro*. Furthermore, we assessed whether the peptide is tolerated by mice using a 3+3 dose escalation scheme. Finally, we

tested the *in vivo* efficacy of Vpr using a clinically relevant orthotopic xenograft mouse model of malignant glioma.

## RESULTS

### Vpr shows high acute toxicity *in vitro*

U251 and U87 cells were treated with varying concentrations of medium-dissolved Vpr (0.1 to 20  $\mu$ M) for 24 to 72 h (Figure 1a and 1b). Here, Vpr exhibited a concentration-dependent toxicity both in U251 and U87 cells in MTT assays. Although both cell lines were equally susceptible to low doses of Vpr (portion of vital cells at 1  $\mu$ M Vpr: 82 $\pm$ 3% for U251 cells and 89 $\pm$ 4 % for U87 cells), U251 showed increased sensitivity towards higher doses (fraction of vital cells at 20  $\mu$ M Vpr: 11 $\pm$ 5 % for U251 cells and 44 $\pm$ 18 % for U87 cells) compared to untreated controls. The median effective doses (EC<sub>50</sub>) were 4.0 $\pm$ 1.1  $\mu$ M for U251 and 15.7 $\pm$ 7.5  $\mu$ M for U87 cells (after 24 hours). When comparing different treatment and incubation periods, there were no detectable differences after 24, 48 and 72 h of Vpr exposition, indicating a predominantly acute toxicity of the peptide.

### Vpr induces apoptosis in glioma cells

U251 and U87 cells were exposed to 5  $\mu$ M Vpr for 36 h and activity of the effector caspases 3 and 7 was measured as an indicator of apoptosis. In parallel, the amount of viable cells was determined at each time point using an ATP-dependent luminescence assay. In U251 cells, caspase activity was increased after 12 h and reached a maximum of 3-fold increase after 24 h (t-test 0 h vs. 24 h:  $p < 0.05$ ) indicating early apoptosis (Figure 1c). The fraction of vital U251 cells decreased analogously, thus the decrease in caspase activity noted after 24 h was likely caused by a general loss of cells (Figure 1d). Vpr did not cause an increase in activity of caspase 3/7 in U87 cells indicating absence of apoptosis. However, cell counts decreased within 24 h compared to untreated controls, indicating a predominantly cytostatic than pro-apoptotic activity of Vpr in these cells.

### Vpr and TMZ show weak additive effects

We next assessed the efficiency of a combined modality treatment with Vpr and TMZ (Figure 2a and 2b). Here a concentration of 100  $\mu$ M of TMZ, which is roughly twice the level achieved *in vivo* [29], resulted in only moderate cell kill within 72 h in U251 (portion of vital cells at 100  $\mu$ M TMZ: 71 $\pm$ 6 %) and U87 cells (84 $\pm$ 8 %). Combined application of TMZ (at a concentration of 100  $\mu$ M) and Vpr resulted in only mildly elevated cell kill and revealed a weak additive rather than a synergistic effect of Vpr and TMZ in U251 (CI<sub>m</sub> = 0.8 $\pm$ 0.4, mean  $\pm$  SEM) and U87 cells (CI<sub>m</sub> = 0.8 $\pm$ 0.2, mean  $\pm$  SEM).

## Vpr inhibits clonogenic survival and acts additively with irradiation

In combined treatment with RT (2-6 Gy), Vpr alone (0 Gy) reduced clonogenicity both in U251 and U87 cells (SF for U251 (geometric means  $\pm$  SEM): 0.85 $\pm$ 0.26 at 5  $\mu$ M, 0.24 $\pm$ 0.004 at 10  $\mu$ M; SF for U87: 0.71 $\pm$ 0.11 at 5  $\mu$ M; 0.35 $\pm$ 0.05 at 10  $\mu$ M; Figure 2c and 2d). Combination therapy with irradiation and Vpr also revealed additive effects (U251:  $CI_m = 1.19 \pm 0.25$ ; U87:  $CI_m = 1.14 \pm 0.24$ ).

## Vpr does not inhibit cell cycle progression

To clarify whether Vpr may also block the G2/M phase in glioma cells, we performed Nicoletti cell cycle assays using Vpr concentrations of 5 and 10  $\mu$ M (Figure 2e and 2f; Supplementary Table 1). TMZ, which is an efficient G2/M blocker, served as control (100  $\mu$ M; [30]). Cells treated with TMZ showed a significant reduction in G1 (U251:  $p=0.004$ ; U87:  $p<0.0001$ ) and an increase in G2/M portions (U251:  $p=0.011$ ; U87:  $p=0.028$ ). Vpr did not cause a G2/M arrest in the tested cell lines, however, the G1 fraction decreases slightly but not significantly in U251 cells and significantly in U87 cells (60 $\pm$ 2 vs.

53 $\pm$ 3 %,  $p=0.027$ ) after treatment with 10  $\mu$ M Vpr. Simultaneously, the sub-G1 fraction (apoptotic cells) of U251 cells increased after Vpr treatment (10  $\mu$ M Vpr: 6.9 $\pm$ 1.1 vs. 19.2 $\pm$ 6.8 %,  $p=0.037$ ), whereas the sub-G1 fraction of U87 cells remained unchanged.

## Vpr acts independently of MGMT expression

We used lentiviral vectors to induce MGMT or GFP (control) over-expression to evaluate whether MGMT may have a role in Vpr-induced damage repair (Figure 3a and 3b). To also account for late cytotoxic effects of TMZ [31], we used the colony formation assay. As expected, MGMT overexpression resulted in marked resistance of U251 cells towards TMZ (SF of U251-MGMT (geometric means  $\pm$  SEM): 0.93 $\pm$ 0.11 at 100  $\mu$ M TMZ vs. 0.10 $\pm$ 0.02 for U251-GFP;  $p<0.01$ ; Figure 3c). Similar data were obtained for U87 cells (SF of U87-MGMT (Geometric means  $\pm$  SEM): 0.85 $\pm$ 0.19 vs. 0.19 $\pm$ 0.07 for U87-GFP;  $p<0.05$ ; Figure 3d). In turn, following treatment with Vpr, both MGMT and GFP-transduced cell lines showed decreased survival without statistically significant differences in the fractions, demonstrating that Vpr effects are entirely independent of MGMT expression levels (Figure 3e and 3f).

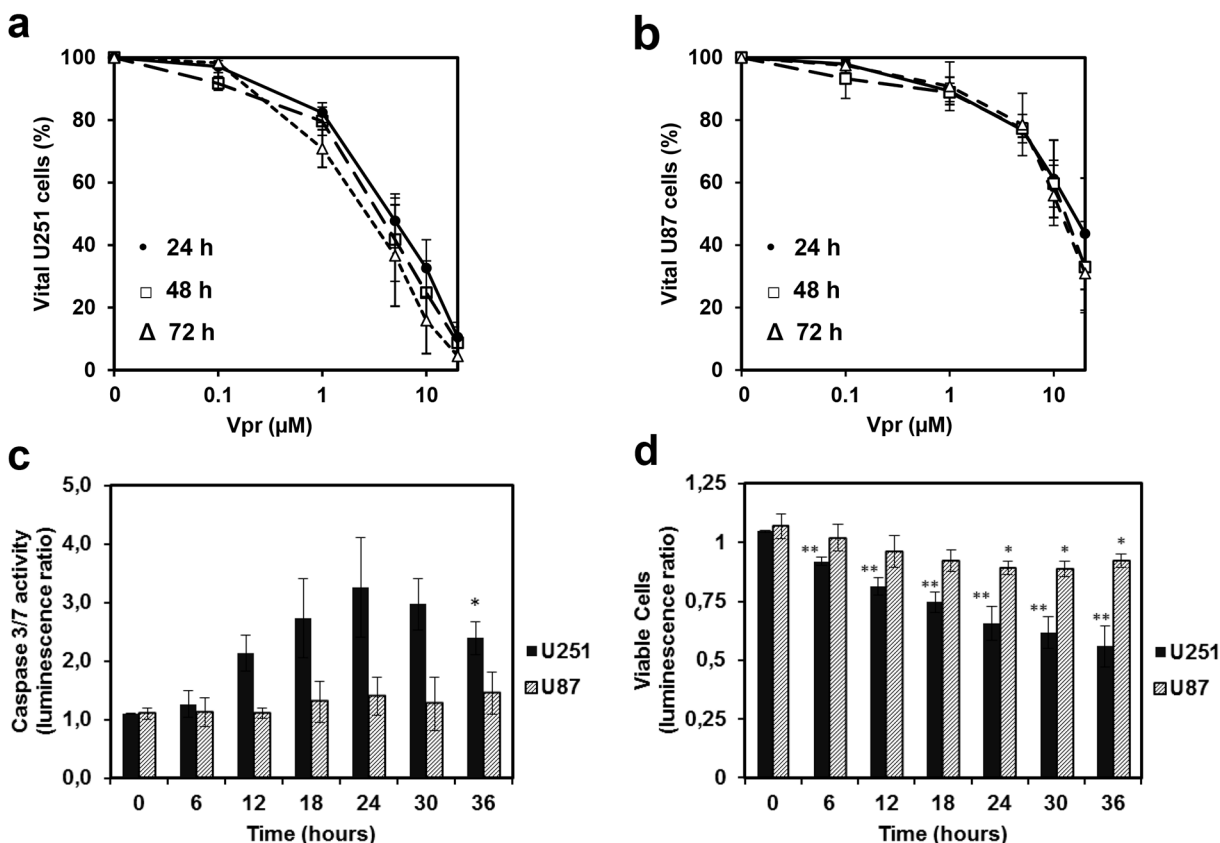

**Figure 1: Vpr exhibits cytotoxic effects in a dose dependent manner and induces apoptosis in glioma cell lines.** Cell viability after treatment of U251 **a.** and U87 cells **b.** with Vpr (0/ 0.1/ 1/ 5/ 10/ 20  $\mu$ M) for 24 (●), 48 (□) and 72(Δ) h. **c.** Effector caspase activity after 12 h. **d.** Assessment of vital cells by the luminescence assay, which was performed in parallel to the caspase activation assay. The ratio was calculated from treated (5  $\mu$ M) and untreated cells and represents the amount of metabolically active cells. Results are presented as mean $\pm$ SD.

## Intravenous application of Vpr is non-toxic to mice

A main prerequisite for future application of the peptide is tolerability *in vivo*. This was tested in a classical 3+3 dose escalation regimen in close analogy to clinical phase I trials (Supplementary Figure 2a). Considering that i) therapeutic concentrations range between 5-10  $\mu\text{M}$ , ii) a NOG mouse has approximately 1-1.5 ml total plasma volume and iii) Vpr consists of mostly hydrophilic amino acids, we initially tested a daily dose of 3x5 mg/kg Vpr per

mouse. Following one case of death (which could not be clarified by necropsy) in the 3x5 mg/kg group, a further cohort of 3 mice had to be treated with the same dose (Supplementary Figure 2b). As no more events or deaths occurred, the dose was escalated to 3x10 mg/kg per day and finally to 3x20 mg/kg per day. At the highest dose level (3x20 mg/kg), all mice developed skin irritations in the form of an asymptomatic livid tail discoloration distal to the injection site within 7-10 days after Vpr injection (Supplementary Figure 2c). Blood workups after 2 weeks included renal and liver function tests as well as electrolyte

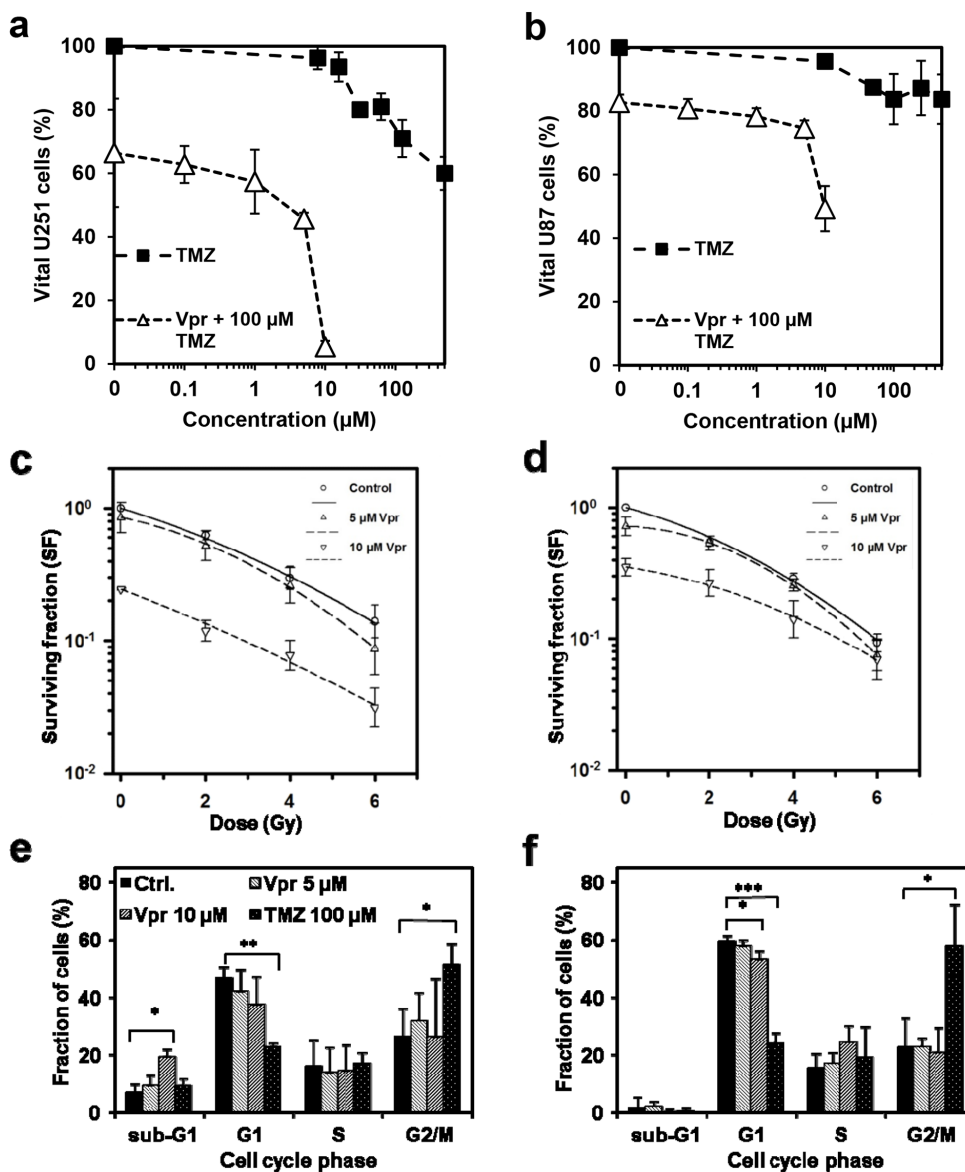

**Figure 2: Vpr shows additive effects in combination with TMZ and RT and inhibits clonogenic survival in glioma cells.** Cell viability after treatment of U251 **a.** and U87 cells **b.** for 72 h with Vpr alone (0.1 – 10  $\mu\text{M}$ ), TMZ alone (10 – 500  $\mu\text{M}$ ) or with a combination of Vpr and TMZ (100  $\mu\text{M}$ ). The DMSO concentration in all samples was adjusted to the highest concentration used in TMZ samples (0.5 %). **c.** Colony formation assays demonstrate clonogenic survival of U251 and U87 cells **d.** after combined treatment with Vpr and radiotherapy. Results are presented as geometric means ( $n = 3$ )  $\pm$  SD. **e.** **f.** Cell cycle distributions after 48 h in U251 and U87 cells. TMZ was used as a positive control for induction of G2 cell cycle arrest. Results from three independent experiments are presented as means  $\pm$  SD or representative figures, respectively. \* $p < 0.05$ ; \*\* $p < 0.01$ ; \*\*\* $p < 0.001$

levels and revealed no differences to reference laboratory values of untreated animals (Supplementary Figure 2d). Due to the skin irritations, Vpr was given via an osmotic pump system at 60 mg/kg over one week in all further experiments.

### Intravenous Vpr induces central tumor necrosis, delays tumor growth and prolongs survival *in vivo*

To test whether Vpr has anti-glioma activity *in vivo*, we employed an orthotopic xenograft model of human high-grade glioma. Following engraftment of U87 cells in the basal ganglia of NOG mice, all animals were continuously monitored by micro-CT, once a tumor was detected (defined as day 0). The animals either underwent observation only, intravenous Vpr treatment over 1 week using an implanted osmotic pump or irradiation with 3x5 Gy every other day

within one week after day 0. The delivery of Vpr via an osmotic pump was chosen to circumvent tail vein injection after the three cases of local tissue reaction (see above). The median tumor volumes at day 0 ranged between 0.26, minimum 0.05, maximum 0.80 mm<sup>3</sup> (3x5 Gy group), 0.44, minimum 0.04, maximum 1.30 mm<sup>3</sup> (untreated group), and 0.34, minimum 0.31, maximum 2.34 mm<sup>3</sup> (Vpr group) and were not statistically different among the three groups (Supplementary Figure 3a; all  $p > 0.18$ ; Mann-Whitney-U-test). Furthermore, tumor volume on day 0 did not correlate with survival time (Supplementary Figure 3b), indicating comparable initial conditions for all three groups.

When comparing tumor growth curves, we observed that constant infusion of Vpr over 1 week resulted in a delay of intracranial tumor growth as compared to untreated animals (Figure 4a). While the control group showed homogenous contrast enhancement of the complete

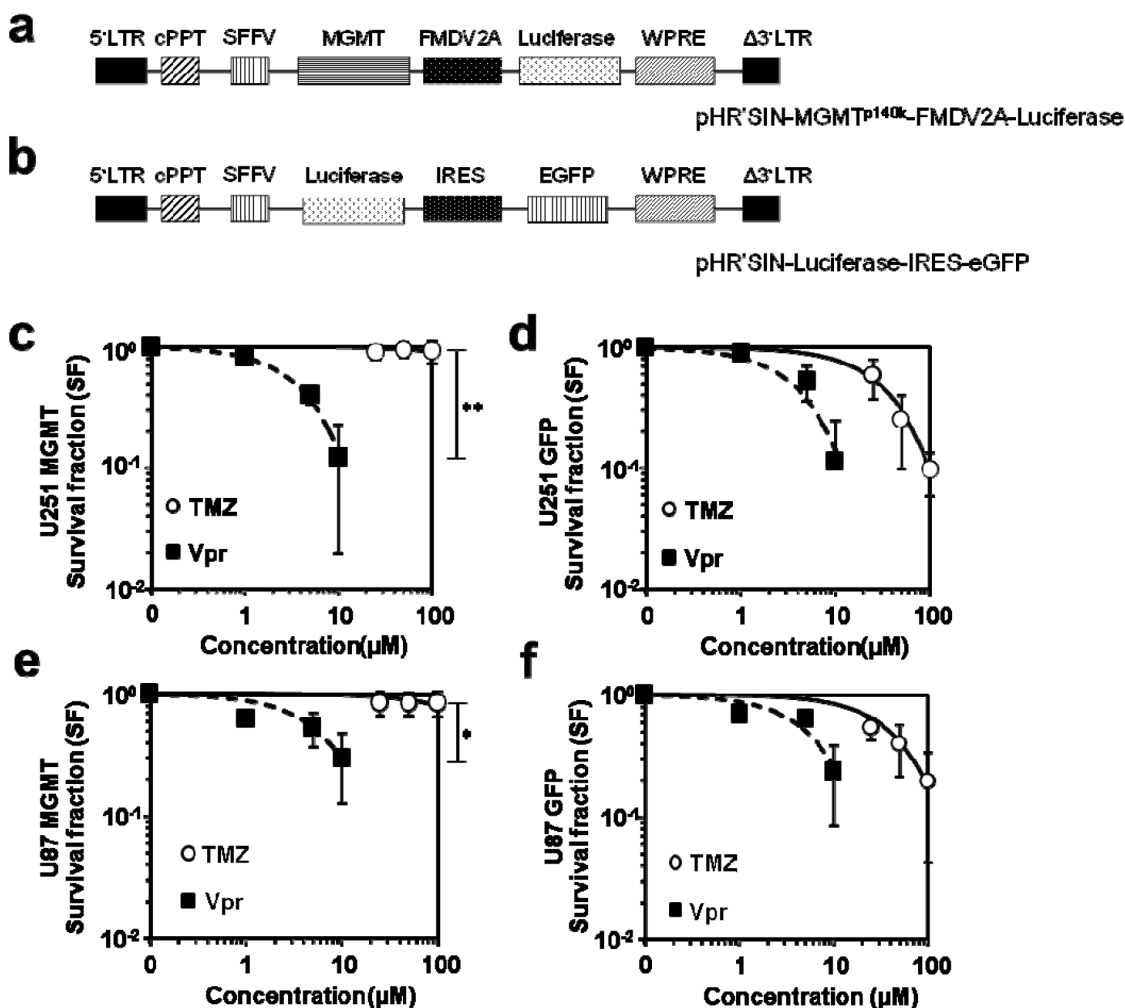

**Figure 3: Vpr effects are not recovered by MGMT.** a. Schematic representation of the lentiviral vector used for expression of MGMT, b. shows the corresponding vector for eGFP expression (control). c. Clonogenic survival of U251-MGMT and e. U87-MGMT cells after exposure to TMZ or Vpr. d. Survival of (wild-type) U251 and U87 f. cells after exposure to TMZ or Vpr. Legend: LTR, long terminal repeat;  $\Delta 3'$ LTR, 3'LTR with deleted U3 region; cPPT, central polypurine tract; SFFV, spleen focus-forming virus LTR sequences; WPRE, woodchuck hepatitis virus post-transcriptional regulatory element; MGMT, O<sup>6</sup>-Methylguanine-DNA-Methyltransferase; EGFP, enhanced green fluorescent protein; FMDV2A, 2A element of foot and mouth disease virus; IRES, internal ribosomal entry site; \* $p < 0.05$ ; \*\* $p < 0.01$ .

tumor in regular CT scans, all animals treated with Vpr or irradiation (3x5 Gy) presented with a central irregular non-enhancement (Figure 4b), suggesting therapeutic effects on the tumors. Consistent with these findings, histological analyses of murine brains showed tumors with central tumor necrosis in Vpr-treated and irradiated mice which was not observed in this extent in untreated mice (Figure 4c). Finally and most importantly, both Vpr and irradiation significantly prolonged overall survival of tumor-bearing mice ( $p_{Vpr}=0.041$ , and  $p_{3 \times 5 \text{ Gy}} < 0.001$ ; log-rank test; Supplementary Table 2, Figure 4d). Of note, compared to all other mice in the trial, the Vpr-treated mouse that died at day 15 showed the largest initial tumor volume (2.3 mm<sup>3</sup> at day 0; Supplementary Figure 3b).

### Combined treatment with irradiation and Vpr is not superior to Vpr monotherapy

To assess whether Vpr is synergistic to radiotherapy, we treated tumor-bearing mice with Vpr (60 mg/kg over one week) and fractionated irradiation (5x3 Gy). Although this treatment arm contained the fewest number of mice (n=4) and resulted in the longest survival of one animal observed within the whole experiment (41 days after first detection), we did not detect an statistically significant difference in overall survival compared to Vpr monotherapy (Supplementary Figure 4).

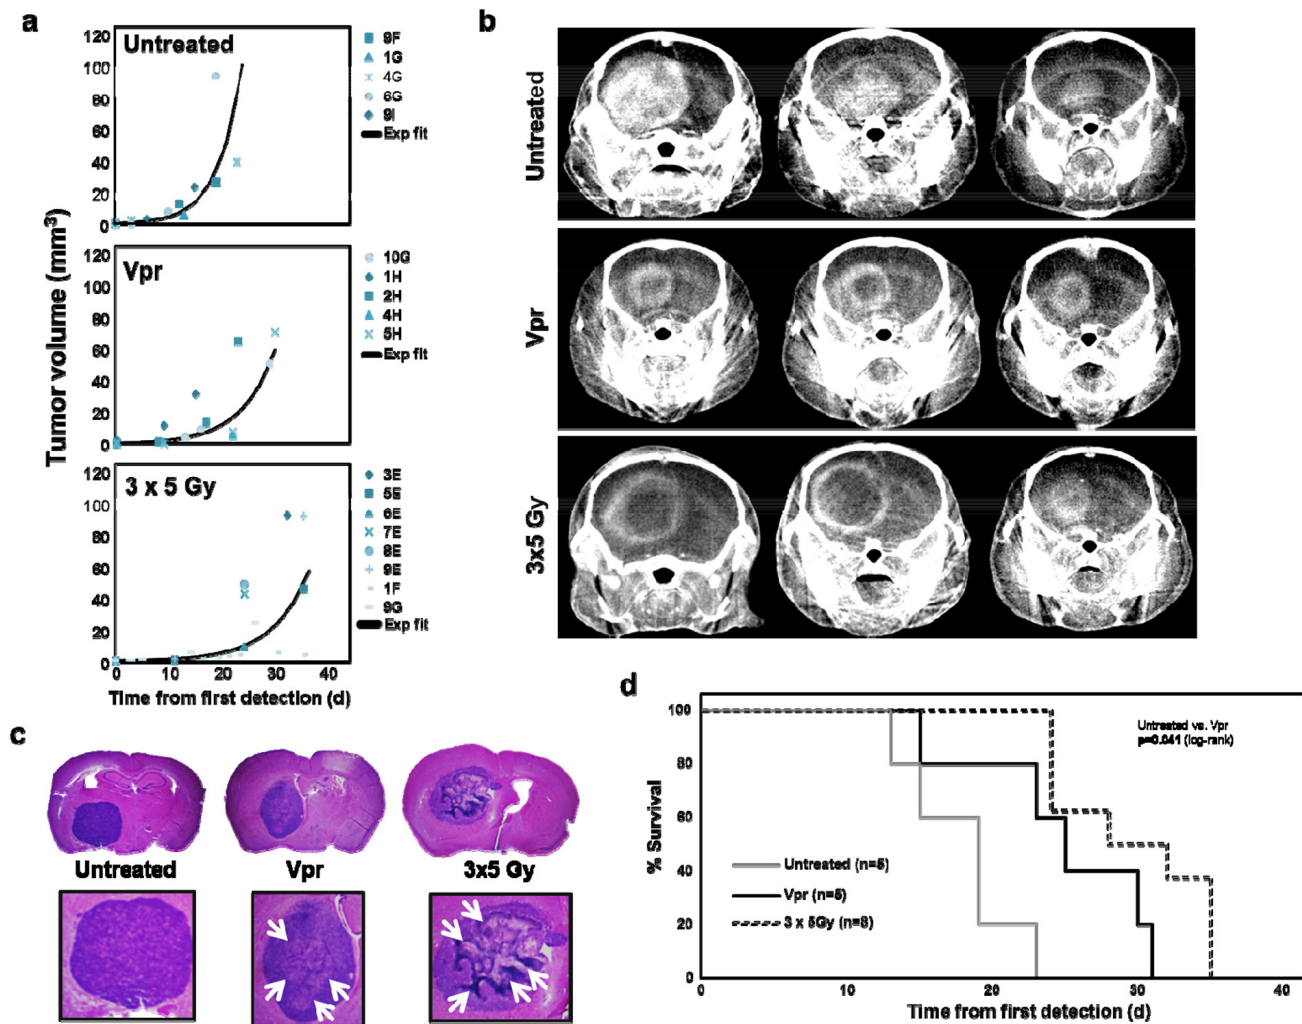

**Figure 4: Vpr is effective in a murine orthotopic glioma xenograft model.** **a.** Shown are the individual tumor volumes (in mm<sup>3</sup>) as a function of time for untreated mice (= control group), mice treated with Vpr or with irradiation (3x5 Gy). An exponential growth curve model was used to fit the data for each mouse with correlation coefficients (adjusted R<sup>2</sup>) in the range from 0.719 to 1.000. The lines represent the exponential fit curves for each data set. Correlation coefficients (adjusted R<sup>2</sup>) of these curves were 0.812 (untreated animals), 0.763 (Vpr) and 0.793 (3x5 Gy). **b.** Exemplary coronal images of contrast-enhanced micro-CT scans of three mice from each group. **c.** Histological workup of murine brains in untreated, Vpr-treated and irradiated mice. The upper panel shows 7 μm-slices of HE-stained murine brains, the lower panel shows a zoom on the corresponding tumor. White Arrows (→) indicate necrotic regions. Of note, the three samples were obtained at different time points, i.e. when animals were exhibiting symptoms and were sacrificed. **d.** Survival curves of the three groups. The log-rank test (see Supplemental Table 2 for details) was used for comparisons of survival curves.

## DISCUSSION

The current study shows that the HIV-derived protein Vpr induces apoptosis in glioma cells, acts independently from MGMT expression status, is tolerated well when given intravenously, delays intracranial tumor growth and prolongs survival in a relevant pre-clinical model of high-grade glioma. Therefore, it has all the traits of a potentially useful agent for the treatment of GBM.

In the light of a rather frustrating decade passing without any significant new therapy option for GBM (and even less for unmethylated GBM), there is an urgent need for more effective therapies to improve poor outcomes in this lethal disease. Novel compounds should i) be able to cross the blood-brain barrier (BBB), ii) be active against glioma cells *per se* and possibly also in those resistant to TMZ and iii) be tolerated adequately at therapeutic doses. A minor prerequisite not specifically related to GBM is a non-complex synthesis and thus an affordable market price. In our opinion Vpr, a peptide encoded by the human immunodeficiency virus (HIV), potentially fulfils all of the mentioned requirements.

In GBM, drugs may not necessarily need to actively “cross” the BBB as these tumors usually present with a disrupted BBB [32, 33], which is even further aggravated by radiotherapy [34–36]. However, although GBM is characterized by a high local relapse rate, it resembles a (central nervous) systemic disease as multiple tumor cells are occultly disseminated throughout the brain at the time of diagnosis [37]. Therefore, suitable antiglioma drugs must be also capable of targeting dispersed tumor cells located in areas with an intact BBB. Vpr may fulfil these criteria as it efficiently crosses cellular membranes and is rapidly internalized [38–40]. Vpr is detectable in significant amounts in cerebrospinal fluid (CSF) of HIV-positive patients, indicating that either infected cells (lymphocytes or microglia) or viral particles cross the BBB, or blood–CSF barrier transition of Vpr in the choroid plexus takes place [20, 41].

The second prerequisite is also fulfilled by Vpr: several reports have demonstrated that Vpr has proven to be toxic for a variety of tumor cell lines *in vitro*, including neuroblastoma and grade III astrocytoma cell lines [8, 20–22]. For the first time, we here showed that the peptide was not only active *in vitro*, but also in a murine orthotopic *in vivo* model. The protein delayed tumor growth as indicated by micro-CT analyses and prolonged survival. It is noteworthy that we measured total tumor volumes, which included the contrast-enhancing parts, as well as the non-enhancing parts (necrotic areas) of the tumors. If we had decided to consider only contrast-enhancing parts (as suggested by RANO criteria), the differences in measured tumor sizes between animals treated with Vpr or irradiation and the untreated control animals would have been even more prominent.

Although the exact mode of action of Vpr is not clarified yet, it has been described that Vpr induces double strand breaks [15, 16] causing a cisplatin- and alkylator-like cellular damage signature [15, 18]. Here, we also showed that Vpr inhibited clonogenic survival, indicating a considerable genomic damage upon drug exposure. Alkylators such as TMZ cause DNA damage and clonogenic cell death by transferring methyl groups to DNA, which can be efficiently and timely removed by MGMT. As the number of viable cells in our MTT assays did not decrease with prolonged exposure to Vpr (the maximum observation period was 72 h), we assume that Vpr rapidly penetrates the cells and subsequently induces irreversible genomic damage. As we did not see any effect of MGMT overexpression on survival of U87 and U251 cells, genomic instability caused by Vpr is likely entirely distinct from this mechanism.

We did not observe Vpr-induced G2/M arrest in U87 and U215 and, consistent with this, clonogenic assays revealed no radiosensitizing effects. One reason may be that we used a truncated version of Vpr lacking the n-terminus. Although there is consensus that apoptosis is mediated by the c-terminal end [42, 43], the region of Vpr causing cell cycle arrest is to date controversially discussed [44, 45]. A further reason may be that Vpr induced cell cycle effects are not unspecific and dependent on different cellular backgrounds. Most of the studies that demonstrated efficient G2/M arrest were performed to explore HIV pathogenicity and, consequently, the cell lines used to evaluate this effect were derived from lymphomas or leukemias – tumors entirely different to glioblastoma [11, 12].

An indispensable characteristic of a useful drug is adequate tolerability of therapeutic doses, which, due to the apparent high and unspecific toxicity of Vpr, was a major concern. Considering that acutely infected patients with actively replicating HIV have peak plasma levels of Vpr, and patients with chronic replication show 24-hour exposure to the peptide [46], we assumed that intravenous application of the peptide is tolerated. In our dose escalation study, local tissue irritation occurred at highest dose levels (3x20 mg/kg/d) and one case of death was noted at the lowest dose (3x5 mg/kg/d). Local tissue irritation or even necrosis is also commonly observed in the clinical setting after unintended paravenous injection of chemotherapeutics. It is unlikely that all three mice were incorrectly injected in our study and thus we decided to apply the peptide via an osmotic pump with a three-fold reduced dose (60 mg/kg over one week) in the therapeutic setting. Although the cause of death could not be clarified by necropsy, the immunodeficient NOG strain is known to be a rather susceptible strain and unclear deaths also occur frequently in untreated NOG mice.

A possibly relevant concern which was not assessable in our model, is the yet undefined link between Vpr and AIDS-related dementia. Vpr has been shown to

exert indirect cytotoxic effects by inducing expression of neurotoxic cytokines in astrocytic and microglial cells [20]. Although this could potentially improve antitumoral responses, it may cause or worsen neurodegeneration with the risk of neurocognitive impairment [47]. However, the overall survival of GBM patients is poor and this specific side effect would be only of significance in a small portion of long-term survivors.

A further advantage of Vpr therapy would be a relatively low market price. Chemically, Vpr as used in this study (the C-terminal fragment Vpr<sub>52-96</sub>) resembles a simple peptide, roughly of the size of insulin (51 aa) and less than a third of the size of erythropoietin alpha. It is soluble in water and stable at 4°C for at least one month (Jens Kuebler, unpublished results). Thus, due to the enormous progress in recombinant DNA technology, large-scale production of recombinant peptides has become feasible at reasonable prices.

Taken together, this study provides evidence that Vpr causes both acute and long-term cytotoxic effects in glioma cells *in vitro* and *in vivo*. As the protein acts independently from MGMT expression status of the tumor cells, it might become a useful substance in the treatment of glioblastoma multiforme.

## MATERIALS AND METHODS

### Viral protein R and alkylating agents

The c-terminal portion of the Viral protein R (Vpr<sub>52-96</sub>, [N-]GDTWAGVEAIIRLQQLLFIHFRIG CRH SRIGVTRQRRARNGASRS[-C]), which contains the active (pathogenic) domain of the viral peptide [40, 48, 49], was used in the reported experiments. The peptide was commercially synthesized (Caslo ApS, Lyngby, Denmark), enriched to >99 % purity and delivered as lyophilized trifluoroacetate salt (powder). The lyophilized peptide was dissolved in sterile water and stock solutions were stored at 4°C. TMZ and O<sup>6</sup>-BG were dissolved in DMSO. BCNU (bis-chloroethylnitrosourea/Carmustin) was dissolved in 100% ethanol. Stock solutions were stored at -20 °C. All chemotherapeutic drugs were purchased from Sigma-Aldrich (Munich, Germany).

### Cells and cell culture

All cell lines described here were obtained from ATCC (Manassas, VA) and thus no authentication was done. The human glioblastoma/astrocytoma cell line U251 was cultured in RPMI-1640 medium (Biochrom AG, Berlin, Germany). The human high-grade glioma cell line U87, the human embryonic kidney cell line 293T and the human fibrosarcoma cell line HT1080 were cultured in DMEM (Dulbecco's modified Eagle's medium; Biochrom). All media were supplemented with 10% FCS, penicillin (100 IU/ml) and streptomycin (100 µg/ml). Cells were cultured at 37°C and 5% CO<sub>2</sub>.

## Construction of lentiviral vectors for MGMT, luciferase and GFP expression

For the construction of *pHR'SIN-MGMT<sup>p140k</sup>-FMDV2A-Luciferase*, the sequence of the luciferase reporter gene was amplified from the plasmid pGL3-basic (Promega, Madison, WI, USA). Overhang PCR was used to create an additional *Apa* I restriction site upstream of the luciferase sequence. The following primers (Metabion, Steinkirchen, Germany) were used: Luciferase forward 5'-GCAAGCTTGGGCCCATGGAAGACGCCAAAAACATAAAG-3'; Luciferase reverse 5'-CGTGATACATCGACTGAAATCCCTGGTAATCCG-3'. The amplified luciferase fragment was then inserted into *MGMT<sup>p140k</sup>-FMDV2A* [50] via *Apa*I and *Xba* I. The amplified products were checked by Sanger sequencing (GATC Biotech AG, Konstanz, Germany). Next, the fragment *MGMT<sup>p140k</sup>-FMDV2A-Luciferase* was inserted into the lentiviral plasmid *pHR'SIN-cPPT-SEW* [51] using *Bam*HI and *Xba* I replacing the coding sequence of eGFP (a second *Xba* I site behind the U3LTR was deleted in advance), resulting in *pHR'SIN-MGMT<sup>p140k</sup>-FMDV2A-Luciferase*. For the transduced controls, we used the vector *pHR'SIN-Luciferase-IRES-eGFP*, which is based on *pHR'SIN-SNAI2* [52] and in which the cDNA of *SNAI2* upstream of the IRES-EMCV element was replaced by the cDNA of luciferase after digestion with *Bam*HI and *Xba* I.

### Production of lentiviral supernatant and determination of viral titers

Lentiviral supernatant was produced as described before [51, 53]. In brief, 293T cells were transfected with the lentiviral plasmids *pHR'SIN-MGMT<sup>p140k</sup>-FMDV2A-Luciferase* or *pHR'SIN-Luciferase-IRES-eGFP* and the two packaging plasmids *pCMVΔR8.91* and *pMD.G* in the presence of Metafectene (Biontex, Martinsried/ Planegg, Germany). Lentiviral supernatants were then collected after 48 h, filtrated (0.45 µm pore-size filter; Millipore, Carrigtwohill, Ireland) and concentrated using Vivaspinn filters (100.000 MWCO; Sartorius, Goettingen, Germany). Aliquots of the viral supernatants were shock-frozen and stored at -80°C. For the determination of viral titers, HT1080 cells were transduced with serial dilutions of the viral supernatants in the presence of polybrene (8 µg/ml; Sigma-Aldrich). Viral titers for the vector *pHR'SIN-Luciferase-IRES-eGFP* were determined by fluorescence-activated cell sorting analysis for eGFP marker gene expression. Titers of the *pHR'SIN-MGMT<sup>p140k</sup>-FMDV2A-Luciferase* vector were determined via a Luciferase Assay (Promega, Fitchburg, Wisconsin, USA) according to the manufacturer's protocol, whereas the intensities of luminescence were compared to HT1080 cells which were transduced in serial dilutions with the control vector *pHR'SIN-Luciferase-IRES-eGFP* at a multiplicity of infection (MOI) of 10.



## Transduction of cells

To generate MGMT-expressing U251 and U87 cells, both cell lines were transduced in presence of polybrene (8 µg/ml) with the MGMT vector *pHR'SIN-MGMT<sup>pl40k</sup>-FMDV2A-Luciferase* at a MOI of 1 and the control vector *pHR'SIN-Luciferase-IRES-eGFP* at a MOI of 10. The GFP-positive population of the control cells U251-GFP and U87-GFP were separated via flow cytometry (BD FACSAria I, Becton Dickinson, Heidelberg), and the sorting process was repeated after 7 days. Cells transduced with the MGMT-containing vector were subjected to selection with O<sup>6</sup>-BG (100 µM) and BCNU (150 µM). To validate successful selection of MGMT-expressing cells, the luciferase expression levels were determined using the Luciferase Assay System (Promega).

## Irradiation of cells

Cells were irradiated with various doses of 6 MV X-rays from a conventional linear accelerator (Versa HD<sup>TM</sup>, Elekta AB, Stockholm, Sweden). Irradiation was performed in T25 flasks (colony formation assay) with a field setup published previously [54]. In combined modality treatments (together with Vpr or TMZ) or control treatments (DMSO), irradiation was performed 6 hours after the addition of the corresponding substance.

## MTT assay

Cells were seeded in 96-well plates (1 to 5x10<sup>3</sup>/well) in 80 µl medium with supplements. Then drugs were added in a volume of 20 µl to the following final concentrations: Vpr: 0.1 µM to 20 µM; TMZ: 10 µM to 500 µM. DMSO concentration in all samples was adjusted to the highest concentration given by TMZ samples (<0.5 %). 20 µl MTT (3-(4,5-dimethylthiazol-2-yl)-2,5-diphenyltetrazolium bromide; 5 mg/ml) was added 24, 48 or 72 h after addition of drugs and the plate was incubated at 37°C for 4 hours. Formazan crystals forming after addition of MTT were dissolved with 100 µl SDS (sodium dodecyl sulfate; 10% in 10 mM HCl) overnight. Thereafter, absorbance was measured at 590 nm (690 nm reference) using a microplate reader (Tecan Infinite M200, Tecan AG, Männedorf, Switzerland). Results were normalized to controls and shown as percent values.

## Colony forming assay

Cells were seeded in T25 Flasks (Falcon, Becton-Dickinson) in the desired densities (2x10<sup>2</sup> to 6x10<sup>3</sup>) into 5 ml medium with supplements and in triplicates. Drugs (Vpr, TMZ and/or DMSO) were added to final concentrations (Vpr 0 µM to 10 µM; TMZ 0 µM to 100 µM). The concentration of DMSO was adjusted to the highest concentration given by TMZ samples (0.1%). Cells were incubated for 6 h at 37°C and irradiated with

6 MV X-rays from a linear accelerator (Synergy, Elekta, Stockholm, Sweden) at doses up to 6 Gy. Directly after the irradiation, the medium was removed and cells were washed carefully with PBS. Thereafter, fresh medium with supplements was added and cells were allowed to grow colonies for 14 to 21 days. In experiments without irradiation (MGMT/eGFP cells lines), the medium was exchanged after 6 h of treatment and cells were allowed to grow colonies. Colonies (defined as cluster of >50 cells) were fixed, stained and counted as described previously [55].

## Apoptosis and cell viability assays

To detect apoptosis, the Caspase-Glo<sup>®</sup> 3/7 assay (Promega, Fitchburg, Wisconsin, USA) was used according to the manufacturer's instructions. In brief, 5x10<sup>3</sup> cells/well were plated in 96 well plates. Vpr (5 µM) was then added and plates were incubated at 37 °C until measurements were performed at 0, 6, 12, 18, 24, 30 and 36 h after Vpr addition using a microplate reader (Tecan infinite M200). To quantify (remaining) viable cells in the apoptosis assays, we used the Cell Titer-Glo<sup>®</sup> Luminescent Cell Viability Assay (Promega) with identical numbers of plated cells and identical treatments as performed in the caspase assay.

## Cell cycle analysis

To determine distribution of cell cycle phases and the fraction of apoptotic cells (sub-G<sub>1</sub>) after treatment with Vpr we used flow cytometry as described previously [56]. Specifically, 1-2x10<sup>6</sup> U251 or U87 cells were plated in T-75 cm<sup>2</sup> flasks and cells were allowed to adhere. Next, Vpr (5 µM or 10 µM) or TMZ (100 µM, DMSO 0.1%) was added. Cells were incubated for 6 h at 37 °C and medium was then exchanged. Cells were harvested after 48 h, fixed overnight in 70 % ice-cold ethanol, washed again and resuspended in PBS. Then, RNase A (2 mg/ml, Sigma-Aldrich) and propidium iodide (1 mg/ml, Sigma-Aldrich) was added and, after incubation for 30 min, cells were analyzed via flow cytometry (BD FACS Canto II). The measurement was analyzed using FlowJo 7.6.5 software (Tree StarInc, Ashland, OR, USA).

## Orthotopic murine glioma model

Immunodeficient 6 to 8 weeks old female NSG mice (NOD.Cg-Prkdc<sup>SCID</sup> Il2rg<sup>tm1Wjl</sup>/SzJ, The Jackson Laboratory, Bar Harbor, Maine, USA) were used for orthotopic tumor implantation. Prior to surgery, all mice were anesthetized by subcutaneous injection of MMF (0.5 mg/kg medetomidine, 5 mg/kg midazolam and 0.05 mg/kg fentanyl) and positioned in a stereotactic frame (TSE Systems, Bad Homburg, Germany) under an operating microscope. After drilling of a 0.5 mm burr hole 1 mm anterior to the bregma and 3 mm lateral to the midline,

2x10<sup>6</sup> U87 cells were injected with a glass syringe (Neuros Syringe, Hamilton) using a 33G blunt needle into the basal ganglia over approximately 10 min [57, 58]. For postoperative pain management, all animals received 200 mg/kg metamizole p.o. (added to tap water). All mice were sacrificed if they showed neurological symptoms or more than 20 % of body weight loss. All animal experiments were approved by the local and governmental authorities.

### Treatment with Vpr

For tolerance testing, we used a 3+3 study in analogy to clinical dose finding trials. Due to the mostly acute effects of the peptide observed *in vitro*, we considered an observation period of 14 days to be sufficient to rule out relevant acute toxic effects *in vivo*. Three mice of the first cohort received i.v. injection (lateral tail vein) with 5 mg/kg of water-dissolved Vpr three times on days 0, 2 and 4 and were closely followed for the development of signs of toxicity up to day 14. Thereafter, the mice were sacrificed and blood was subjected to liver (LFT) and renal function tests (RFT). If no toxicity was noted, the dose was doubled to 3x10 mg/kg/d and then to 3x20 mg/kg/d. If a mouse showed pathological LFT, RFT or died, a further group of 3 mice received the same dose. If no signs of toxicity were observed, the dose was escalated to the next dose level.

For tumor treatment with Vpr, tumor-bearing mice were anaesthetized using MMF (see above) and an osmotic minipump (ALZET 2001, DURECT Corp, Cupertino, CA) was placed subcutaneously with a catheter (MJC-AL, DURECT) implanted into the right jugular vein. The pumps were filled with 170 µl of water-dissolved Vpr to deliver a dose of 60 mg/kg over a period of 1 week (1 µl/h). Before implantation and after explanation, all pumps were weighed to ensure correct treatment. Mice bearing pumps with evident catheter clotting or irregular weight were excluded from further analyses.

### Irradiation of mice and combined radiotherapy and Vpr treatment

Irradiation was performed under anesthesia (MMF, see above) with three coplanar beams in a fractionated regimen of 15 Gy delivered in three fractions of 5 Gy by a small-animal irradiation device capable of image-guided radiotherapy [59]. For validation of adequate target volume coverage we used Gafchromic® films mounted between RW3 plates (Supplementary Figure 1). In mice treated with combined therapy (Vpr and radiotherapy), irradiation was performed one day after implantation of the osmotic pump.

### *In vivo* monitoring of tumor growth

Starting two weeks after engraftment, animals were screened weekly for intracranial tumors using contrast-

enhanced micro-CT (Kirschner *et al.*, *in re-submission*; [59]. Briefly, 300 µl of a iodine-based contrast agent (Iomeprol; Imeron® 300, Bracco Imaging Group, Germany) were injected via the lateral tail vein and CT-imaging was performed within 5 min as described before [60, 61]. Tumor volumetry of micro-CT images was performed by contouring total tumor volumes (contrast-enhancing + non-enhancing regions) using OsiriX Freeware [62].

### Statistics and survival analysis

Results of all *in vitro* assays are presented as means of at least three independent experiments together with the corresponding standard deviations. For detection of statistical differences in all *in vitro* assays, an unpaired two-sided t-test was used. To account for multiple testing in cell culture experiments, we adjusted p values using Bonferroni correction. For calculation of IC<sub>50</sub> values and for evaluation of combination effects, we used the method of Chou and Talalay [63] available in the CalcuSyn software suite (Biosoft, Cambridge, UK). Mean combination index (CI<sub>m</sub>) values were calculated and assessed whereby CI values greater than 1, equal to 1 or smaller than 1 indicated antagonism, additivity or synergism. Surviving fractions (SF) for irradiation experiments were fitted by the linear-quadratic model ( $\ln(\text{SF}) = -(\alpha D + \beta D^2)$ ) by nonlinear regression using SigmaPlot v11 (Systat Software GmbH, Erkrath, Germany) [55].

Tumor volumes at day 0 in the different treatment groups were compared using a Mann-Whitney-U test. For comparisons of *in vivo* tumor growth, we used an exponential growth curve model to fit the CT data for each mouse. No formal statistical testing was performed, owing to the relatively small number of animals and the frequency of missing CT data at different time points.

Overall survival (OS) of mice was measured from the date of diagnosis (defined as the day on which a tumor was detected in a CT scan) until the date of death and the log-rank test (Mantel-Cox) was used for comparisons of survival. All statistical analyses of *in vivo* data were performed using SPSS version 22 (IBM Corp., Armonk, NY, USA).

### ACKNOWLEDGMENTS

The excellent support of Dr. Bettina Kränzlin, Miriam Bierbaum, Anne Kirchner and the team of the animal core facility of the Medical Faculty Mannheim shall be gratefully acknowledged.

### CONFLICTS OF INTEREST

None to this work.

## GRANT SUPPORT

This work was funded by a grant of the Klaus Tschira Stiftung Heidelberg (grant 00.211.2012; FG and FW), the Irmgard- und Udo Kahrau Stiftung, Frankfurt (FG), the Prof. Dr. Karl und Gerhard Schiller Stiftung, Frankfurt (FG), the Federal Ministry of Education and Research (grant BMBF 02NUK008F) for the establishment of the endowed professorship Medical Radiation Physics/ Radiation Protection (GG) and a young investigator fellowship to JK by the Deutsche Krebshilfe (grant #110781). The small-animal irradiation device used in this work was funded by the Deutsche Forschungsgemeinschaft (grants FL 880/1-1, GI 771/1-1, GL 236/9-1 and WE 2063/9-1). The micro-CT (YXLON Y.Fox) was funded by the Federal Ministry of Education and Research and the Land Baden-Württemberg (HBFG grant #125-648).

## REFERENCES

1. Bower M, Palmieri C, Dhillon T. AIDS-related malignancies: changing epidemiology and the impact of highly active antiretroviral therapy. *Current opinion in infectious diseases*. 2006; 19:14-19.
2. Rosso R, Di Biagio A, Viscoli C. Infectious complications of cancer chemotherapy in HIV patients. *Current infectious disease reports*. 2008; 10:149-156.
3. Smith KJ, Skelton HG, Tuur S, Yeager J, Decker C, Wagner KF. Increased cutaneous toxicity to ionizing radiation in HIV-positive patients. *Military Medical Consortium for the Advancement of Retroviral Research (MMCARR). International journal of dermatology*. 1997; 36:779-782.
4. Harris MA, Wise MS, Bonington A, Slevin NJ. Case report: radical radiotherapy for early laryngeal cancer in a patient with human immunodeficiency virus: no evidence of increased toxicity. *The British journal of radiology*. 2004; 77:519-520.
5. Shrivastava SK, Engineer R, Rajadhyaksha S, Dinshaw KA. HIV infection and invasive cervical cancers, treatment with radiation therapy: toxicity and outcome. *Radiotherapy and oncology*. 2005; 74:31-35.
6. Oehler-Janne C, Seifert B, Lutolf UM, Ciernik IF. Local tumor control and toxicity in HIV-associated anal carcinoma treated with radiotherapy in the era of antiretroviral therapy. *Radiation oncology*. 2006; 1:29.
7. Zhao RY, Bukrinsky M, Elder RT. HIV-1 viral protein R (Vpr) & host cellular responses. *Indian J Med Res*. 2005; 121:270-286.
8. Arokium H, Kamata M, Chen I. Virion-associated Vpr of human immunodeficiency virus type 1 triggers activation of apoptotic events and enhances fas-induced apoptosis in human T cells. *J Virol*. 2009; 83:11283-11297.
9. Levy DN, Fernandes LS, Williams WV, Weiner DB. Induction of cell differentiation by human immunodeficiency virus 1 vpr. *Cell*. 1993; 72:541-550.
10. Mahalingam S, Ayyavoo V, Patel M, Kieber-Emmons T, Weiner DB. Nuclear import, virion incorporation, and cell cycle arrest/differentiation are mediated by distinct functional domains of human immunodeficiency virus type 1 Vpr. *J Virol*. 1997; 71:6339-6347.
11. He J, Choe S, Walker R, Di Marzio P, Morgan DO, Landau NR. Human immunodeficiency virus type 1 viral protein R (Vpr) arrests cells in the G2 phase of the cell cycle by inhibiting p34cdc2 activity. *J Virol*. 1995; 69:6705-6711.
12. Jowett JB, Planelles V, Poon B, Shah NP, Chen ML, Chen IS. The human immunodeficiency virus type 1 vpr gene arrests infected T cells in the G2 + M phase of the cell cycle. *J Virol*. 1995; 69:6304-6313.
13. Belzile JP, Abrahamyan LG, Gerard FC, Rougeau N, Cohen EA. Formation of mobile chromatin-associated nuclear foci containing HIV-1 Vpr and VPRBP is critical for the induction of G2 cell cycle arrest. *PLoS Pathog*. 2010; 6:e1001080.
14. Muthumani K, Zhang D, Hwang DS, Kudchodkar S, Dayes NS, Desai BM, Malik AS, Yang JS, Chattergoon MA, Maguire HC, Jr., Weiner DB. Adenovirus encoding HIV-1 Vpr activates caspase 9 and induces apoptotic cell death in both p53 positive and negative human tumor cell lines. *Oncogene*. 2002; 21:4613-4625.
15. Poon B, Jowett JB, Stewart SA, Armstrong RW, Rishton GM, Chen IS. Human immunodeficiency virus type 1 vpr gene induces phenotypic effects similar to those of the DNA alkylating agent, nitrogen mustard. *J Virol*. 1997; 71:3961-3971.
16. Shimura M, Onozuka Y, Yamaguchi T, Hatake K, Takaku F, Ishizaka Y. Micronuclei formation with chromosome breaks and gene amplification caused by Vpr, an accessory gene of human immunodeficiency virus. *Cancer Res*. 1999; 59:2259-2264.
17. Koyama T, Sun B, Tokunaga K, Tatsumi M, Ishizaka Y. DNA damage enhances integration of HIV-1 into macrophages by overcoming integrase inhibition. *Retrovirology*. 2013; 10:21.
18. Siddiqui K, Del Valle L, Morellet N, Cui J, Ghafouri M, Mukerjee R, Urbanska K, Fan S, Pattillo CB, Deshmane SL, Kiani MF, Ansari R, Khalili K, Roques BP, Reiss K, Bouaziz S, et al. Molecular mimicry in inducing DNA damage between HIV-1 Vpr and the anticancer agent, cisplatin. *Oncogene*. 2008; 27:32-43.
19. Stewart SA, Poon B, Jowett JB, Xie Y, Chen IS. Lentiviral delivery of HIV-1 Vpr protein induces apoptosis in transformed cells. *Proc Natl Acad Sci U S A*. 1999; 96:12039-12043.
20. Jones GJ, Barsby NL, Cohen EA, Holden J, Harris K, Dickie P, Jhamandas J, Power C. HIV-1 Vpr causes

- neuronal apoptosis and in vivo neurodegeneration. *J Neurosci.* 2007; 27:3703-3711.
21. Nonaka M, Hashimoto Y, Takeshima SN, Aida Y. The human immunodeficiency virus type 1 Vpr protein and its carboxy-terminally truncated form induce apoptosis in tumor cells. *Cancer Cell Int.* 2009; 9:20.
  22. Muthumani K, Lambert VM, Shanmugam M, Thieu KP, Choo AY, Chung JC, Satishchandran A, Kim JJ, Weiner DB, Ugen KE. Anti-tumor activity mediated by protein and peptide transduction of HIV viral protein R (Vpr). *Cancer Biol Ther.* 2009; 8:180-187.
  23. Pang S, Kang MK, Kung S, Yu D, Lee A, Poon B, Chen IS, Lindemann B, Park NH. Anticancer effect of a lentiviral vector capable of expressing HIV-1 Vpr. *Clin Cancer Res.* 2001; 7:3567-3573.
  24. McCray AN, Ugen KE, Heller R. Enhancement of anti-melanoma activity of a plasmid expressing HIV-1 Vpr delivered through in vivo electroporation. *Cancer Biol Ther.* 2007; 6:1269-1275.
  25. Weller M, van den Bent M, Hopkins K, Tonn JC, Stupp R, Falini A, Cohen-Jonathan-Moyal E, Frappaz D, Henriksson R, Balana C, Chinot O, Ram Z, Reifenberger G, Soffietti R, Wick W. EANO guideline for the diagnosis and treatment of anaplastic gliomas and glioblastoma. *Lancet Oncol.* 2014; 15:e395-403.
  26. Stupp R, Mason WP, van den Bent MJ, Weller M, Fisher B, Taphoorn MJ, Belanger K, Brandes AA, Marosi C, Bogdahn U, Curschmann J, Janzer RC, Ludwin SK, Gorlia T, Allgeier A, Lacombe D, et al. Radiotherapy plus concomitant and adjuvant temozolomide for glioblastoma. *The New England journal of medicine.* 2005; 352:987-996.
  27. Stupp R, Hegi ME, Mason WP, van den Bent MJ, Taphoorn MJ, Janzer RC, Ludwin SK, Allgeier A, Fisher B, Belanger K, Hau P, Brandes AA, Gijtenbeek J, Marosi C, Vecht CJ, Mokhtari K, et al. Effects of radiotherapy with concomitant and adjuvant temozolomide versus radiotherapy alone on survival in glioblastoma in a randomised phase III study: 5-year analysis of the EORTC-NCIC trial. *Lancet Oncol.* 2009; 10:459-466.
  28. Weller M, Stupp R, Reifenberger G, Brandes AA, van den Bent MJ, Wick W, Hegi ME. MGMT promoter methylation in malignant gliomas: ready for personalized medicine? *Nat Rev Neurol.* 2010; 6:39-51.
  29. Ostermann S, Csajka C, Buclin T, Leyvraz S, Lejeune F, Decosterd LA, Stupp R. Plasma and cerebrospinal fluid population pharmacokinetics of temozolomide in malignant glioma patients. *Clinical cancer research.* 2004; 10:3728-3736.
  30. Hirose Y, Katayama M, Mirzoeva OK, Berger MS, Pieper RO. Akt activation suppresses Chk2-mediated, methylating agent-induced G2 arrest and protects from temozolomide-induced mitotic catastrophe and cellular senescence. *Cancer research.* 2005; 65:4861-4869.
  31. Hirose Y, Berger MS, Pieper RO. p53 effects both the duration of G2/M arrest and the fate of temozolomide-treated human glioblastoma cells. *Cancer Res.* 2001; 61:1957-1963.
  32. Wolburg H, Noell S, Fallier-Becker P, Mack AF, Wolburg-Buchholz K. The disturbed blood-brain barrier in human glioblastoma. *Molecular aspects of medicine.* 2012; 33:579-589.
  33. Sage MR, Wilson AJ. The blood-brain barrier: an important concept in neuroimaging. *AJNR American journal of neuroradiology.* 1994; 15:601-622.
  34. Qin DX, Zheng R, Tang J, Li JX, Hu YH. Influence of radiation on the blood-brain barrier and optimum time of chemotherapy. *International journal of radiation oncology, biology, physics.* 1990; 19:1507-1510.
  35. Baumann BC, Kao GD, Mahmud A, Harada T, Swift J, Chapman C, Xu X, Discher DE, Dorsey JF. Enhancing the efficacy of drug-loaded nanocarriers against brain tumors by targeted radiation therapy. *Oncotarget.* 2013; 4:64-79. doi: 10.18632/oncotarget.777.
  36. van Vulpel M, Kal HB, Taphoorn MJ, El-Sharouni SY. Changes in blood-brain barrier permeability induced by radiotherapy: implications for timing of chemotherapy? (Review). *Oncol Rep.* 2002; 9:683-688.
  37. Sahn F, Capper D, Jeibmann A, Habel A, Paulus W, Troost D, von Deimling A. Addressing diffuse glioma as a systemic brain disease with single-cell analysis. *Arch Neurol.* 2012; 69:523-526.
  38. Macreadie IG, Arunagiri CK, Hewish DR, White JF, Azad AA. Extracellular addition of a domain of HIV-1 Vpr containing the amino acid sequence motif H(S/F)RIG causes cell membrane permeabilization and death. *Mol Microbiol.* 1996; 19:1185-1192.
  39. Yao S, Torres AM, Azad AA, Macreadie IG, Norton RS. Solution structure of peptides from HIV-1 Vpr protein that cause membrane permeabilization and growth arrest. *J Pept Sci.* 1998; 4:426-435.
  40. Greiner VJ, Shvadchak V, Fritz J, Arntz Y, Didier P, Frisch B, Boudier C, Mely Y, de Rocquigny H. Characterization of the mechanisms of HIV-1 Vpr(52-96) internalization in cells. *Biochimie.* 2011; 93:1647-1658.
  41. Levy DN, Refaeli Y, Weiner DB. The vpr regulatory gene of HIV. *Curr Top Microbiol Immunol.* 1995; 193:209-236.
  42. Jacotot E, Ravagnan L, Loeffler M, Ferri KF, Vieira HL, Zamzami N, Costantini P, Druilennec S, Hoebeke J, Briand JP, Irinopoulou T, Daugas E, Susin SA, Cointe D, Xie ZH, Reed JC, et al. The HIV-1 viral protein R induces apoptosis via a direct effect on the mitochondrial permeability transition pore. *The Journal of experimental medicine.* 2000; 191:33-46.
  43. Sabbah EN, Roques BP. Critical implication of the (70-96) domain of human immunodeficiency virus type 1 Vpr protein in apoptosis of primary rat cortical and striatal neurons. *Journal of neurovirology.* 2005; 11:489-502.

44. Macreadie IG, Castelli LA, Hewish DR, Kirkpatrick A, Ward AC, Azad AA. A domain of human immunodeficiency virus type 1 Vpr containing repeated H(S/F)RIG amino acid motifs causes cell growth arrest and structural defects. *Proc Natl Acad Sci U S A*. 1995; 92:2770-2774.
45. Berglez JM, Castelli LA, Sankovich SA, Smith SC, Curtain CC, Macreadie IG. Residues within the HFRIGC sequence of HIV-1 vpr involved in growth arrest activities. *Biochem Biophys Res Commun*. 1999; 264:287-290.
46. Hoshino S, Sun B, Konishi M, Shimura M, Segawa T, Hagiwara Y, Koyanagi Y, Iwamoto A, Mimaya J, Terunuma H, Kano S, Ishizaka Y. Vpr in plasma of HIV type 1-positive patients is correlated with the HIV type 1 RNA titers. *AIDS Res Hum Retroviruses*. 2007; 23:391-397.
47. Ghafouri M, Amini S, Khalili K, Sawaya BE. HIV-1 associated dementia: symptoms and causes. *Retrovirology*. 2006; 3:28.
48. Schuler W, Wecker K, de Rocquigny H, Baudat Y, Sire J, Roques BP. NMR structure of the (52-96) C-terminal domain of the HIV-1 regulatory protein Vpr: molecular insights into its biological functions. *J Mol Biol*. 1999; 285:2105-2117.
49. Lum JJ, Cohen OJ, Nie Z, Weaver JG, Gomez TS, Yao X-J, Lynch D, Pilon AA, Hawley N, Kim JE, Chen Z, Montpetit M, Sanchez-Dardon J, Cohen EA, Badley AD. Vpr R77Q is associated with long-term nonprogressive HIV infection and impaired induction of apoptosis. *Journal of Clinical Investigation*. 2003; 111:1547-1554.
50. Maier P, Heckmann D, Spier I, Laufs S, Zucknick M, Allgayer H, Fruehauf S, Zeller WJ, Wenz F. F2A sequence linking MGMT(P140K) and MDR1 in a bicistronic lentiviral vector enables efficient chemoprotection of haematopoietic stem cells. *Cancer Gene Ther*. 2012; 19:802-810.
51. Demaison C, Parsley K, Brouns G, Scherr M, Battmer K, Kinnon C, Grez M, Thrasher AJ. High-level transduction and gene expression in hematopoietic repopulating cells using a human immunodeficiency [correction of immunodeficiency] virus type 1-based lentiviral vector containing an internal spleen focus forming virus promoter. *Human gene therapy*. 2002; 13:803-813.
52. Maier P, Herskind C, Barzan D, Zeller WJ, Wenz F. SNAI2 as a novel radioprotector of normal tissue by gene transfer using a lentiviral bicistronic SIN vector. *Radiat Res*. 2010; 173:612-619.
53. Maier P, Spier I, Laufs S, Veldwijk MR, Fruehauf S, Wenz F, Zeller WJ. Chemoprotection of human hematopoietic stem cells by simultaneous lentiviral overexpression of multidrug resistance 1 and O(6)-methylguanine-DNA methyltransferase(P140K). *Gene Ther*. 2010; 17:389-399.
54. Veldwijk MR, Zhang B, Wenz F, Herskind C. The biological effect of large single doses: a possible role for non-targeted effects in cell inactivation. *PLoS One*. 2014; 9:e84991.
55. Liu Q, Schneider F, Ma L, Wenz F, Herskind C. Relative Biologic Effectiveness (RBE) of 50 kV X-rays measured in a phantom for intraoperative tumor-bed irradiation. *International journal of radiation oncology, biology, physics*. 2013; 85:1127-1133.
56. Nicoletti I, Migliorati G, Pagliacci MC, Grignani F, Riccardi C. A rapid and simple method for measuring thymocyte apoptosis by propidium iodide staining and flow cytometry. *Journal of immunological methods*. 1991; 139:271-279.
57. Kawakami K, Kioi M, Liu Q, Kawakami M, Puri RK. Evidence that IL-13R alpha2 chain in human glioma cells is responsible for the antitumor activity mediated by receptor-directed cytotoxin therapy. *J Immunother*. 2005; 28:193-202.
58. Kioi M, Vogel H, Schultz G, Hoffman RM, Harsh GR, Brown JM. Inhibition of vasculogenesis, but not angiogenesis, prevents the recurrence of glioblastoma after irradiation in mice. *J Clin Invest*. 2010; 120:694-705.
59. Felix M, Fleckenstein J, Kirschner S, Brockmann MA, Wenz F, Giordano FA, Glatting G. Converting a Standard Micro-CT Into an IGRT-Competent Small Animal Irradiation Device. *International Journal of Radiation Oncology, Biology, Physics*. 2014; 90:S804-S805.
60. Fiebig T, Boll H, Figueiredo G, Kerl HU, Nittka S, Groden C, Kramer M, Brockmann MA. Three-dimensional in vivo imaging of the murine liver: a micro-computed tomography-based anatomical study. *PLoS One*. 2012; 7:e31179.
61. Schambach SJ, Bag S, Schilling L, Groden C, Brockmann MA. Application of micro-CT in small animal imaging. *Methods*. 2010; 50:2-13.
62. Rosset A, Spadola L, Ratib O. OsiriX: an open-source software for navigating in multidimensional DICOM images. *J Digit Imaging*. 2004; 17:205-216.
63. Chou TC, Talalay P. Quantitative analysis of dose-effect relationships: the combined effects of multiple drugs or enzyme inhibitors. *Adv Enzyme Regul*. 1984; 22:27-55.
